# Supplementary material for: Engagement and Nonusage Attrition With a Free Physical Activity Promotion Program: The Case of 10,000 Steps Australia
Source: PubMed Central journal article supplement (PMC4526999; doi:10.2196/jmir.4339), 2015-07-15
Supplement: jmir_v17i7e176_app1.pdf [file jmir_v17i7e176_app1.pdf]

**Supplementary Table 1.** Sociodemographics, engagement, and physical activity by user group in the subsample of users who were 10,000 Steps members for at least 3 months (n=11,651).

| Variables                                                  | Overall<br>n=11,651  | Web only<br>n=9800   | App only<br>n=973    | Web and app<br>n=878 | $F_{2,2}$ | $\chi^2_2$ | $P$                  |
|------------------------------------------------------------|----------------------|----------------------|----------------------|----------------------|-----------|------------|----------------------|
| <b>Sociodemographics</b>                                   |                      |                      |                      |                      |           |            |                      |
| Age, mean (SD)                                             | 41.4 (11.9)          | 41.9 (12.0)          | 38.3 (11.2)          | 38.7 (11.1)          | 66.0      |            | <.001 <sup>ab</sup>  |
| Females, n (%)                                             | 8266 (70.95)         | 6920 (70.61)         | 703 (72.3)           | 643 (73.2)           |           | 3.7        | .17                  |
| Australians, n (%)                                         | 9631 (82.66)         | 8001 (81.64)         | 841 (86.4)           | 789 (89.9)           |           | 48.5       | <.001                |
| Membership days, mean (SD)                                 | 223.2 (44.7)         | 223.6 (44.7)         | 219.5 (45.8)         | 223.0 (43.2)         | 3.8       |            | .02 <sup>a</sup>     |
| <b>Engagement</b>                                          |                      |                      |                      |                      |           |            |                      |
| Duration of usage (days), mean (SD)                        | 36.2 (30.3)          | 34.4 (28.0)          | 40.2 (36.7)          | 51.0 (40.8)          | 132.5     |            | <.001 <sup>abc</sup> |
| Individual challenges, mean (SD)                           | 0.1 (0.5)            | 0.1 (0.4)            | 0.2 (0.7)            | 0.3 (0.9)            | 119.7     |            | <.001 <sup>abc</sup> |
| Workplace challenges, mean (SD)                            | 0.9 (0.5)            | 0.9 (0.5)            | 0.9 (0.6)            | 1.0 (0.5)            | 9.25      |            | <.001 <sup>abc</sup> |
| Number of days physical activity was logged for, mean (SD) | 32.3 (24.6)          | 31.0 (23.3)          | 34.9 (28.4)          | 43.4 (30.7)          | 110.3     |            | <.001 <sup>abc</sup> |
| <b>Physical activity</b>                                   |                      |                      |                      |                      |           |            |                      |
| Steps per day, mean (SD)                                   | 10,869.1<br>(4122.7) | 10,853.1<br>(4184.3) | 10,586.3<br>(3789.0) | 11,361.5<br>(3728.6) | 8.6       |            | <.001 <sup>bc</sup>  |

<sup>a</sup> Web only is different from app only.

<sup>b</sup> Web only is different from Web and app.

<sup>c</sup> App only is different from Web and app.
